# Supplementary material for: Sulfur-doped silicon oxycarbide by facile pyrolysis process as an outstanding stable performance lithium-ion battery anode
Source: Royal Society of Chemistry journal article supplement (doi:10.1039/d4ra04608k), 2024-01-01
Supplement: d4ra04608k1.pdf [file d4ra04608k1.pdf]

## Supplementary information

### **Sulfur-doped Silicon Oxycarbide by Facile Pyrolysis Process as an Outstanding Stable Performance Lithium-Ion Battery Anode**

*Jungjin Park <sup>a,1</sup>, Won Young An <sup>a,1</sup>, Keunho Lee <sup>a</sup>, Seungman Park <sup>a</sup>, Minjun Bae <sup>a</sup>, Seon Jae Hwang <sup>a</sup>, Hwichan Hong <sup>a</sup>, Yonghwan Kim <sup>a</sup>, Taehyun Yoo <sup>a</sup>, Dohyeong Kim <sup>a</sup>, Jong Min Kim <sup>c, \*</sup>, and Yuanzhe Piao <sup>a, b, \*</sup>*

<sup>a</sup> Graduate School of Convergence Science and Technology, Seoul National University, 145 Gwanggyo-ro, Yeongtong-gu, Suwon-Si, Gyeonggi-do, 16229, Republic of Korea

<sup>b</sup> Advanced Institutes of Convergence Technology, 145 Gwanggyo-ro, Yeongtong-gu, Suwon-si, Gyeonggi-do, 16229, Republic of Korea

<sup>c</sup> Samsung Electro-Mechanics, 150, Maeyeong-ro, Yeongtong-gu, Suwon-si, Gyeonggi-do, 16674, Republic of Korea

\*Corresponding Authors

E-mail: parkat9@snu.ac.kr (Y. Piao)

E-mail: vitamin66@snu.ac.kr (J. M. Kim)

- Fig. S1**  $N_2$  adsorption/desorption isotherms of (a) SiOC and (b) S-SiOC. (BET surface area of SiOC, S-SiOC is  $0.257 \text{ m}^2 \text{ g}^{-1}$ ,  $2.033 \text{ m}^2 \text{ g}^{-1}$  respectively.) (c) BJH pore size distribution for the SiOC and S-SiOC.
- Fig. S2** Morphology and microstructure of SiOC.
- Fig. S3** Quantitative analysis spectra and atomic percentage of (a) SiOC and (b) S-SiOC corresponding from EDS analysis (inset).
- Fig. S4** XRD patterns of SiOC and S-SiOC.
- Fig. S5** High resolution XPS spectra of (a) C 1s, (b) O 1s, (c) Si 2p and (d) S 2p in SiOC.
- Fig. S6** XPS spectra of (a) F 1s, (b) O 1s, and (c) C 1s in SiOC and S-SiOC anode after initial cycle.
- Fig. S7** Voltage profile of (a) SiOC and (b) S-SiOC during GITT analysis. (c) Demonstration of a single titration with  $\Delta E_v$ ,  $\Delta E_s$  parameters. (d) Relationship between the voltage and square root of the pulse time at a single current pulse during GITT analysis of both electrodes.
- Fig. S8** Cycle performance and coulombic efficiency of S-SiOC electrode at  $1 \text{ A g}^{-1}$  for 2000 cycles ( $0.7 \text{ mg cm}^{-2}$  of loading mass).
- Fig. S9** SEM images of S-SiOC (a) before and (b) after cycling test. (c) TEM image of S-SiOC after cycling test.
- Table S1** EIS fitting results of SiOC and S-SiOC electrodes.
- Table S2** Comparison of electrochemical performances between the S-SiOC electrode and other reported SiOC-based electrodes.

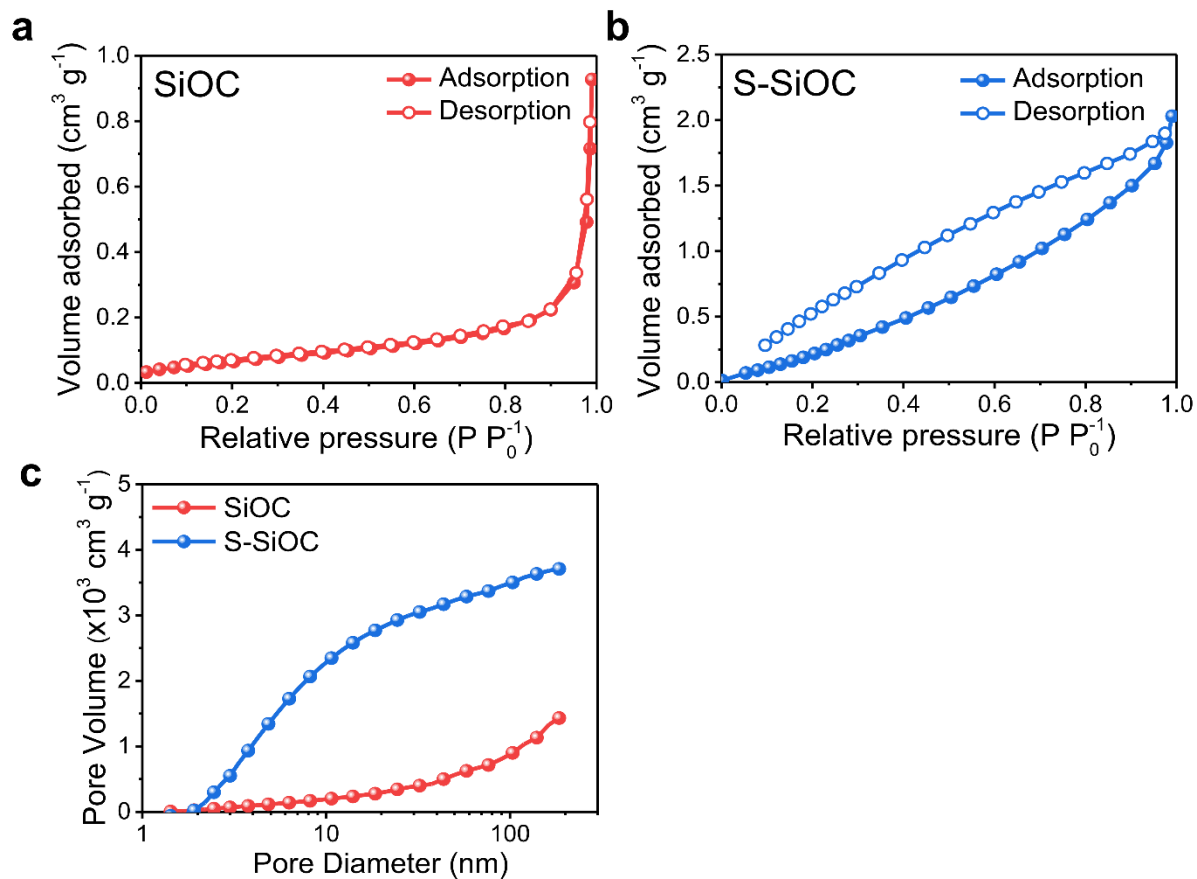

**Fig. S1.** N<sub>2</sub> adsorption/desorption isotherms of (a) SiOC and (b) S-SiOC. (BET surface area of SiOC, S-SiOC is 0.257 m<sup>2</sup> g<sup>-1</sup>, 2.033 m<sup>2</sup> g<sup>-1</sup> respectively.) (c) BJH pore size distribution for the SiOC and S-SiOC.

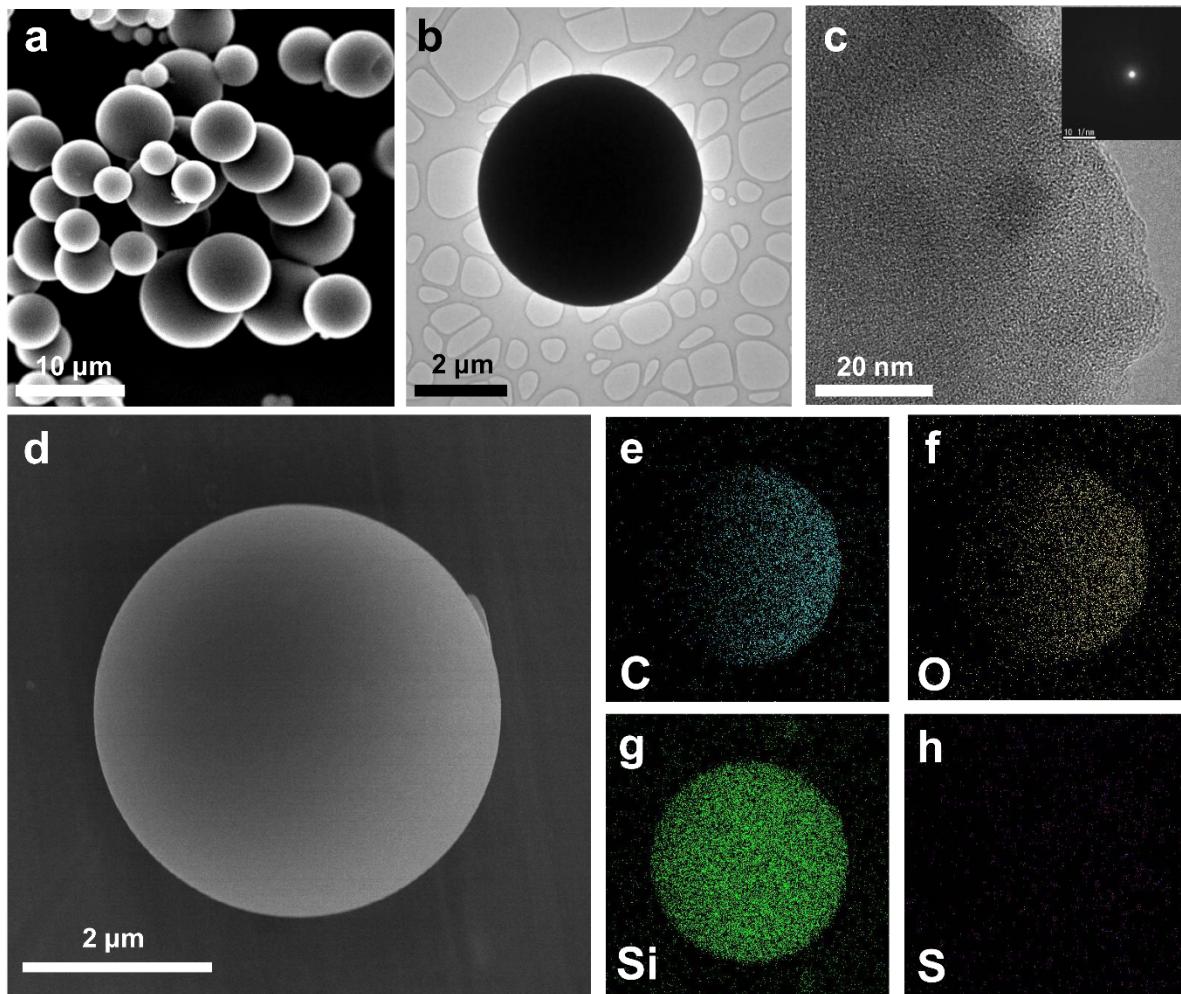

**Fig. S2.** Morphology and microstructure of SiOC. (a) SEM image of SiOC; (b) TEM and (c) HRTEM images of SiOC (SAED pattern inset); (e) Carbon, (f) oxygen, (g) silicon, (h) sulfur elemental mappings of SiOC corresponding (d).

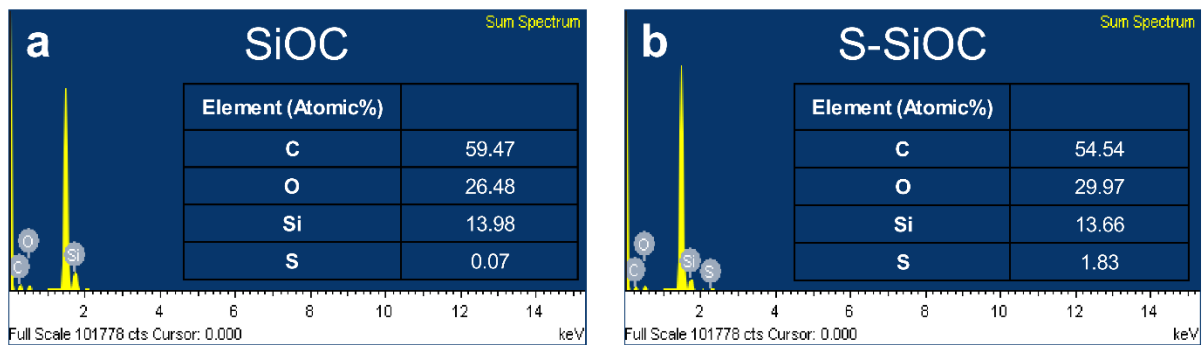

**Fig. S3.** Quantitative analysis spectra and atomic percentage of (a) SiOC and (b) S-SiOC corresponding from EDS analysis (inset).

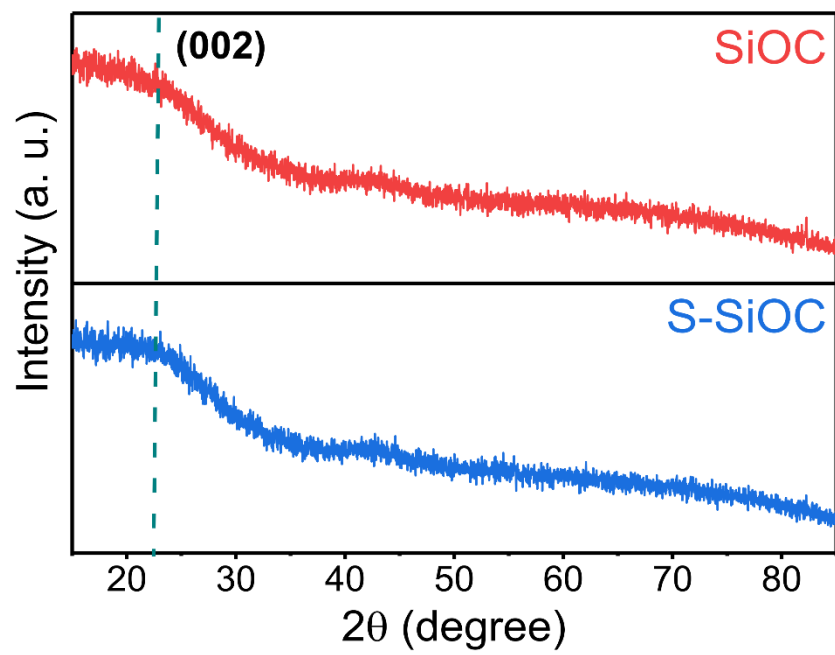

**Fig. S4.** XRD patterns of SiOC and S-SiOC.

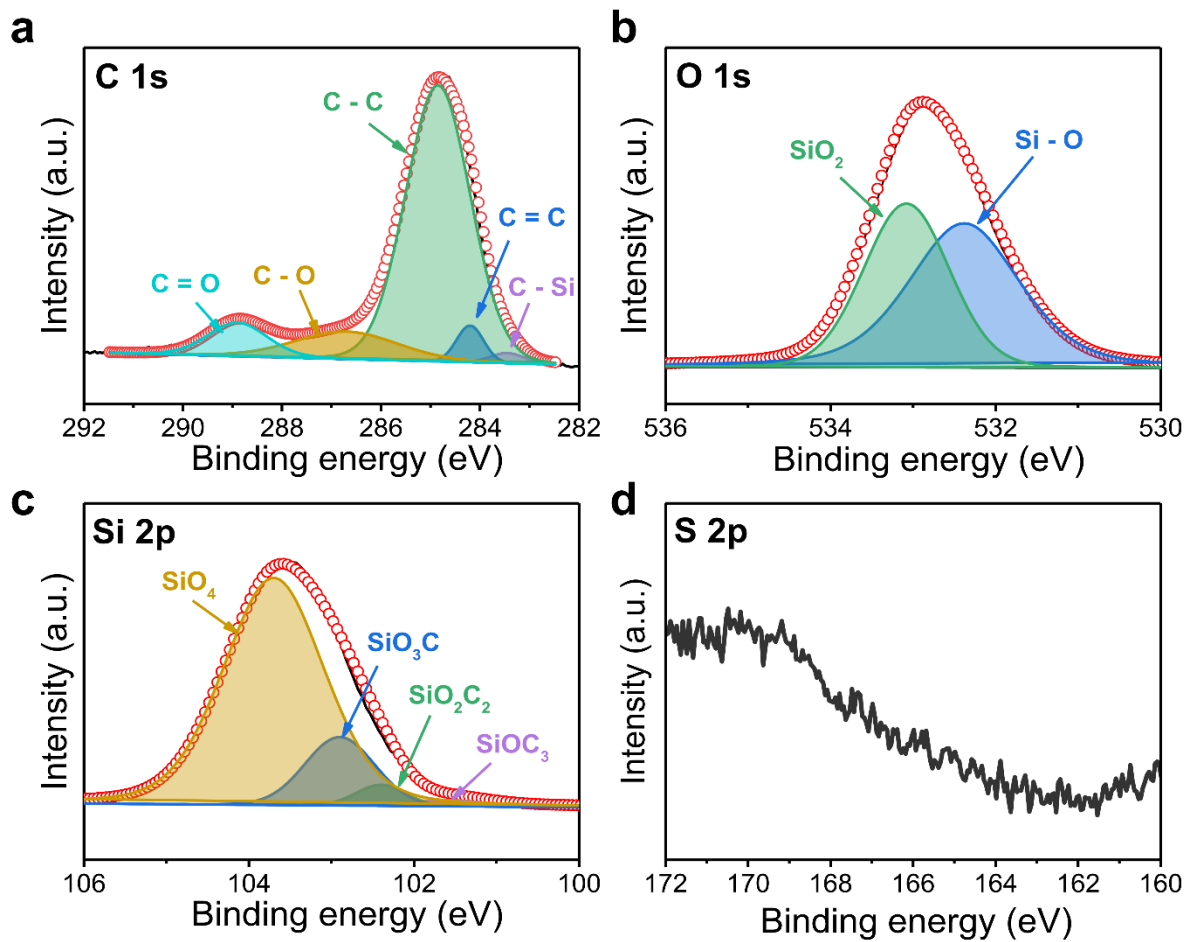

**Fig. S5.** High resolution XPS spectra of (a) C 1s, (b) O 1s, (c) Si 2p and (d) S 2p in SiOC.

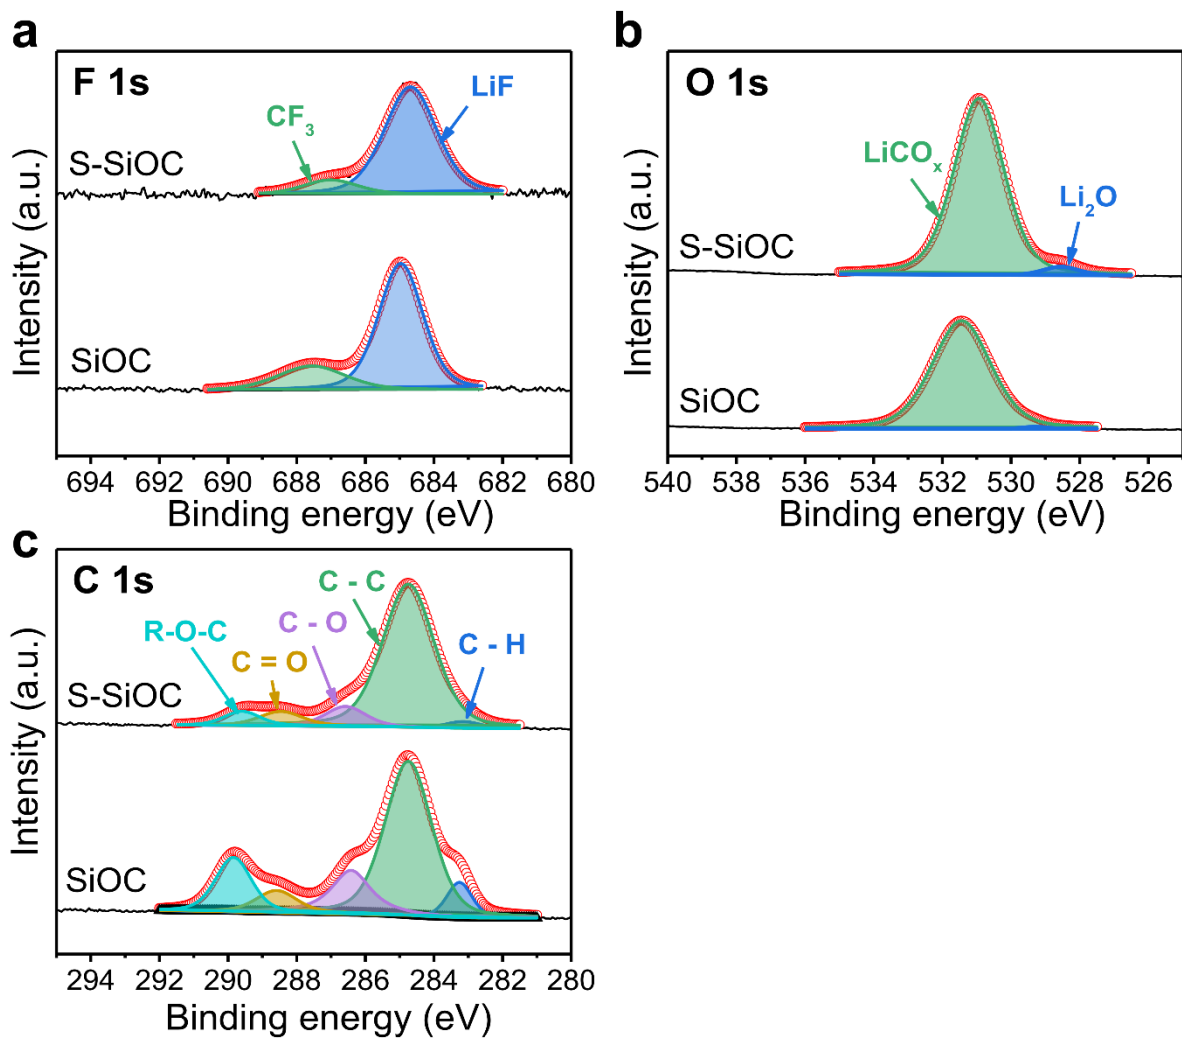

**Fig. S6.** XPS spectra of (a) F 1s, (b) O 1s, and (c) C 1s in SiOC and S-SiOC anode after initial cycle.



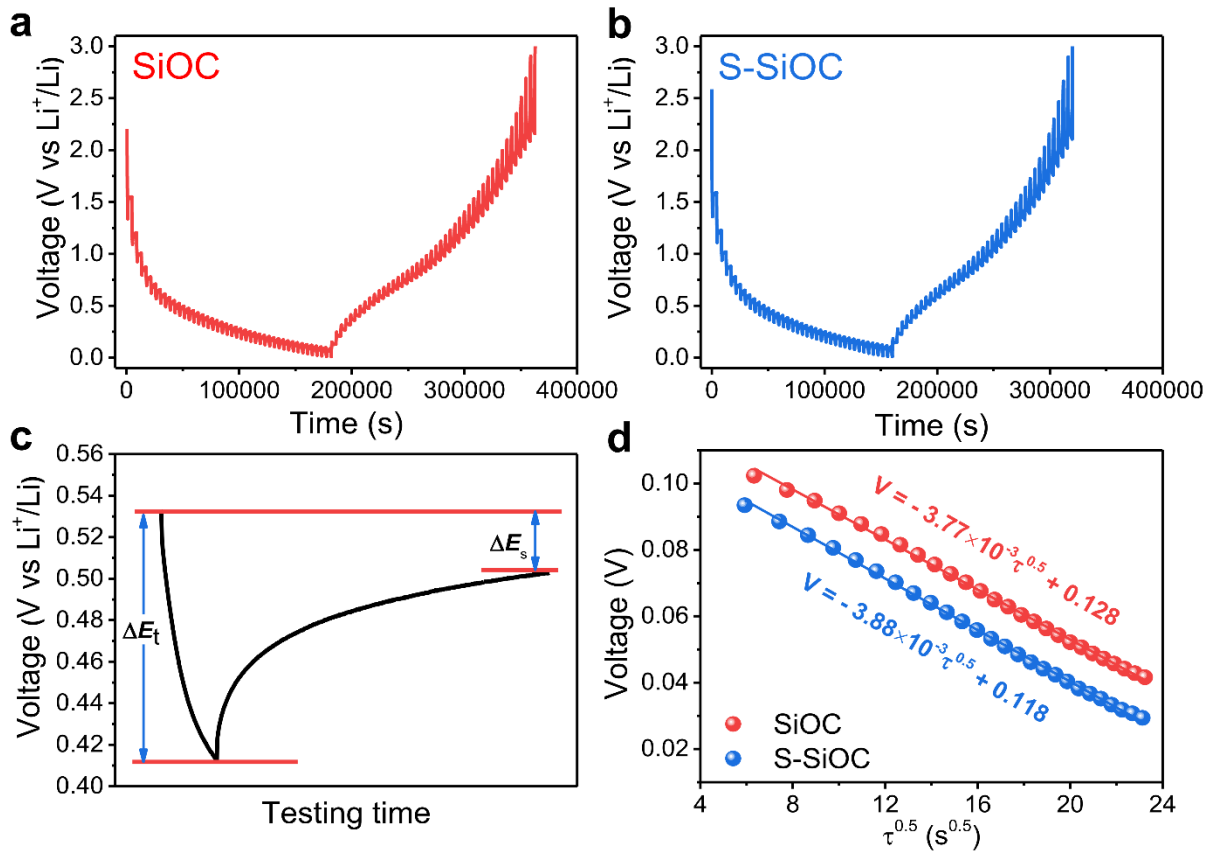

**Fig. S7.** Voltage profile of (a) SiOC and (b) S-SiOC during GITT analysis. (c) Demonstration of a single titration with  $\Delta E_t$ ,  $\Delta E_s$  parameters. (d) Relationship between the voltage and square root of the pulse time at a single current pulse during GITT analysis of both electrodes.

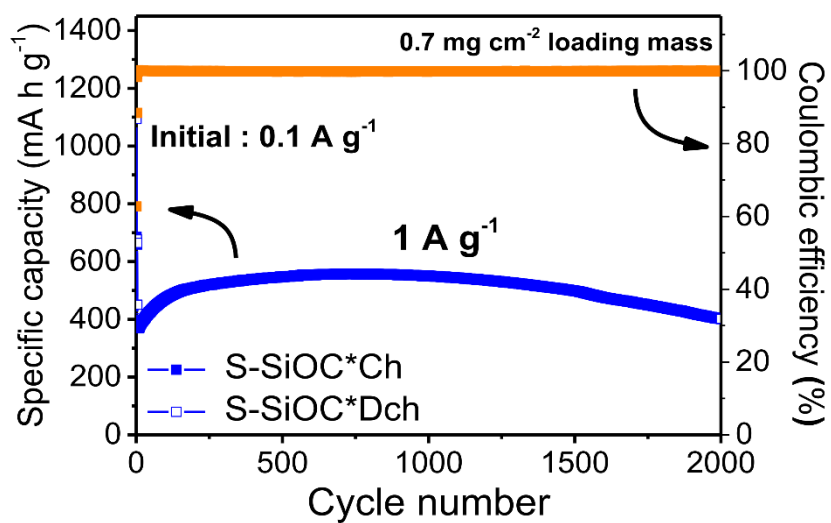

**Fig. S8.** Cycle performance and coulombic efficiency of S-SiOC electrode at  $1 \text{ A g}^{-1}$  for 2000 cycles ( $0.7 \text{ mg cm}^{-2}$  of loading mass).

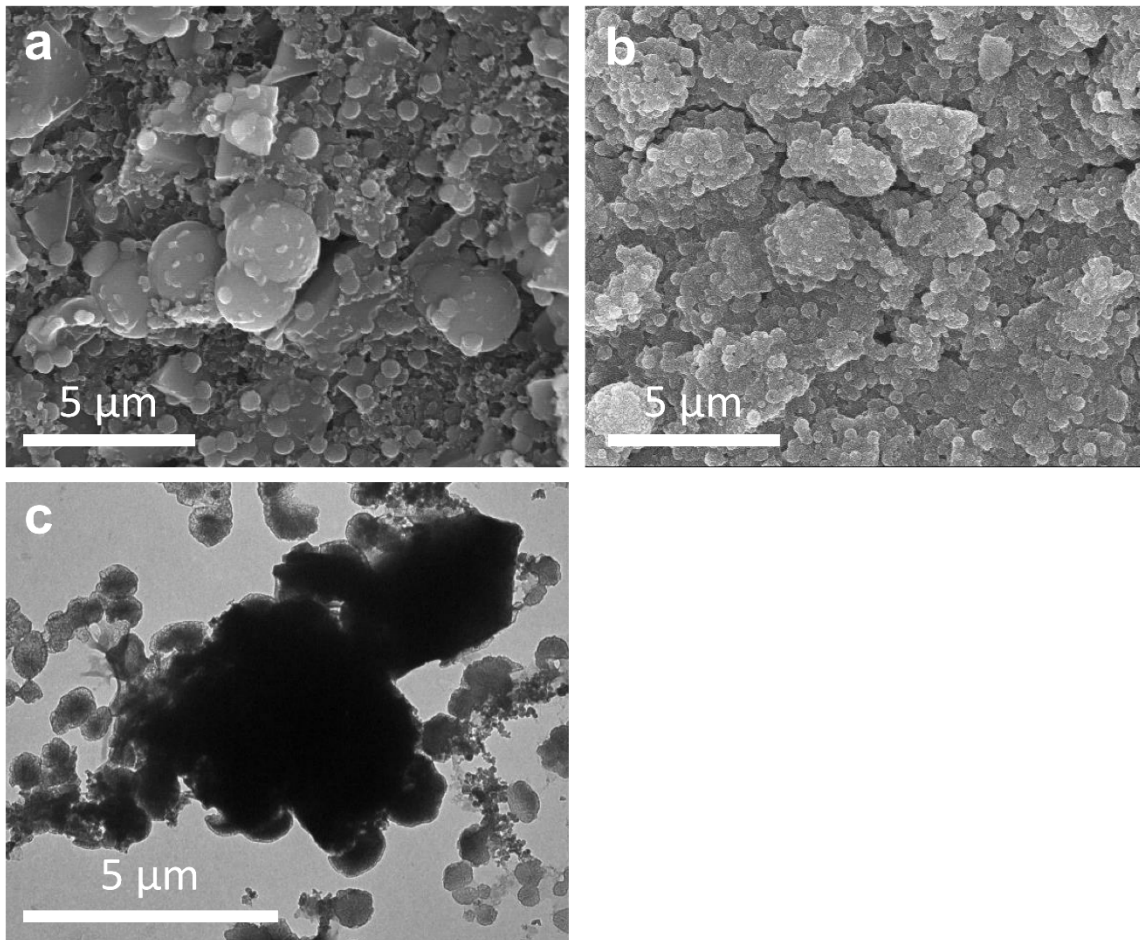

**Fig. S9.** SEM images of S-SiOC (a) before and (b) after cycling test. (c) TEM image of S-SiOC after cycling test.

**Table S1.** EIS fitting results of SiOC and S-SiOC electrodes.

| <b>Parameter</b> | <b>SiOC</b> | <b>S-SiOC</b> |
|------------------|-------------|---------------|
| $R_s/\Omega$     | 4.69        | 4.57          |
| $R_{SEI}/\Omega$ | 12.8        | 12.2          |
| $R_{ct}/\Omega$  | 87.2        | 43.0          |
| $W-R/\Omega$     | 0.00158     | 0.00461       |

**Table S2.** Comparison of electrochemical performances between the S-SiOC electrode and other reported SiOC-based electrodes.

| Anode                                                                  | Synthesis method                                                   | Initial specific capacity (mAh g <sup>-1</sup> )    | Initial Coulombic efficiency (%) | Cycle property                                                                          | Ref.      |
|------------------------------------------------------------------------|--------------------------------------------------------------------|-----------------------------------------------------|----------------------------------|-----------------------------------------------------------------------------------------|-----------|
| S-SiOC                                                                 | Facile one-pot pyrolysis (800°C for 5 hours)                       | 1146 mAh g <sup>-1</sup> at 0.1 A g <sup>-1</sup>   | 69.9                             | 89.2% retention after 2000 cycles at 1 A g <sup>-1</sup>                                | This work |
| Onion-like pre-SiOC/C spheres                                          | One-step injection pyrolysis (900°C for 30 min)                    | 839.3 mAh g <sup>-1</sup> at 0.1 A g <sup>-1</sup>  | 78.4                             | 82% retention after 500 cycles at 2 A g <sup>-1</sup>                                   | [1]       |
| Divinylbenzene and polymethylsilsesquioxane coordinated SiOC (S-DVB-1) | One-step pyrolysis (1200°C for 1 hour)                             | 1273.5 mAh g <sup>-1</sup> at 0.1 A g <sup>-1</sup> | 64.38                            | Remaining capacity to 476 mAh g <sup>-1</sup> after 500 cycles at 0.5 A g <sup>-1</sup> | [2]       |
| Rambutan-like vertical graphene coated hollow porous SiOC (Hp-SiOC@VG) | Hydrothermal (180°C for 12 hours) + pyrolysis (1000°C for 2 hours) | 729 mAh g <sup>-1</sup> at 0.1 A g <sup>-1</sup>    | 75                               | 98% retention after 600 cycles at 1 A g <sup>-1</sup>                                   | [3]       |
| Intercalated SiOC/graphene composites                                  | Pyrolysis (800°C for 4 hours)                                      | 965 mAh g <sup>-1</sup> at 0.05 A g <sup>-1</sup>   | 63                               | 60% retention after 90 cycles                                                           | [4]       |
| Nearly kilogram-scale preparation of SiOC composites                   | CVD method (1000°C)                                                | 988 mAh g <sup>-1</sup> at 0.1 A g <sup>-1</sup>    | 70                               | 88% retention after 2000 cycles at 1                                                    | [5]       |

|                                                                                       |                                                             |                                                     |      |                                                                                |     |
|---------------------------------------------------------------------------------------|-------------------------------------------------------------|-----------------------------------------------------|------|--------------------------------------------------------------------------------|-----|
| Amorphous polymer-derived SiOC (NGA-SiOC25)                                           | Pyrolysis (900°C for 1 hour)                                | 1116 mAh g <sup>-1</sup> at 0.037 A g <sup>-1</sup> | 67.3 | A g <sup>-1</sup><br>95% retention after 1000 cycles at 1.48 A g <sup>-1</sup> | [6] |
| A SiOC bead mixture of vinyltrimethoxysilane with phenyltrimethoxysilane (Vi-Ph-SiOC) | MicroJet reactor technique + pyrolysis (1100°C for 3 hours) | 922 mAh g <sup>-1</sup> at 0.035 A g <sup>-1</sup>  | 76.8 | 83% retention after 100 cycles at 0.07 A g <sup>-1</sup>                       | [7] |

## References

- [1] X. Lin, Y. Dong, X. Liu, X. Chen, A. Li, H. Song, In-situ pre-lithiated onion-like SiOC/C anode materials based on metallasilsesquioxanes for Li-ion batteries, *Chem. Eng. J.*, 428 (2022) 132125.
- [2] P. Wu, X. Guo, Z. Su, C. Liu, S. Chen, Z. Zheng, A. Liu, Preparation of silicon oxycarbide (SiOC) anodes for high performance Li-ion batteries using competitive relationship between crosslinking and polymeriz
- [3] K. Li, G. Yuan, X. Liu, Y. Guo, R. Huang, H. Li, H. Zhang, Q. Jia, Z. Xie, S. Zhang, W. Lei, On the practical applicability of rambutan-like SiOC anode with Enhanced reaction kinetics for lithium-ion storage, *Adv. Funct. Mater.*, 33 (2023) 2302348.
- [4] Y. Ren, B. Yang, X. Huang, F. Chu, J. Qiu, J. Ding, Intercalated SiOC/graphene composites as anode material for Li-ion batteries, *Solid State Ion.*, 278 (2015) 198-202.
- [5] S. Fan, J. Zhang, S. Cui, L. Chen, X. Chen, J. Rang, W. Wang, Y. Liu, J.-T. Zhao, Large-

scale synthesis of SiOC composites for stable Li-ion battery anode and denrite-free Li metal deposition, *Chem. Eng. J.*, 479 (2024) 147785.

- [6] G. Shao, D.A.H. Hanaor, J. Wang, D. Kober, S. Li, X. Wang, X. Shen, M.F. Bekheet, A. Gurlo, Polymer-derived SiOC integrated with a graphene aerogel as a highly stable Li-ion battery anode, *ACS Appl. Mater. Interfaces*, 12 (2020) 46045-46056.
- [7] B. Krüner, C. Odenwald, N. Jäckel, A. Tolosa, G. Kickelbick, V. Presser, Silicon oxycarbide beads from continuously produced polysilsesquioxane as stable anode material for lithium-ion batteries, *ACS Appl. Energy Mater.* 1 (2018) 2961-2970.
